# Supplementary material for: Precision mapping child undernutrition for nearly 600,000 inhabited census villages in India
Source: PubMed Central journal article supplement (PMC8106321; doi:10.1073/pnas.2025865118), 2021-04-26
Supplement: pnas.2025865118.sapp.pdf [file pnas.2025865118.sapp.pdf]

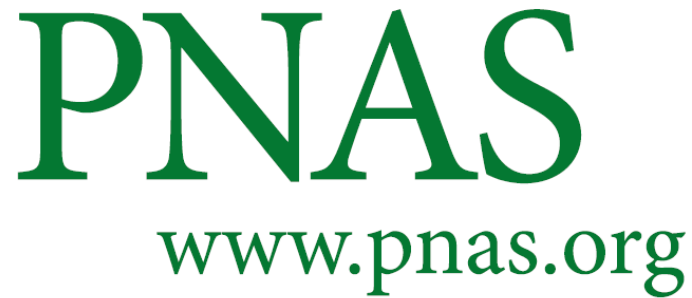

**Supplementary Information for**

Precision mapping child undernutrition for nearly 600,000 inhabited census villages in India

Rockli Kim, Ameen Bijral, Yun Xu, Xiuyuan Zhang, Jeffrey C. Blossom, Akshay Swaminathan, Gary King, Alok Kumar, Rakesh Sarwal, Juan M. Lavista Ferres, S.V. Subramanian

Correspondence to S.V. Subramanian  
Email: svsubram@hsph.harvard.edu

**This PDF file includes:**

Figures S1 to S4  
Tables S1  
Legend for Dataset S1 to S2

**Other supplementary materials for this manuscript include the following:**

Datasets S1 to S2

**Fig S1.** The initial values for villages are obtained by taking the average of the estimates corresponding to the clusters these villages are mapped to

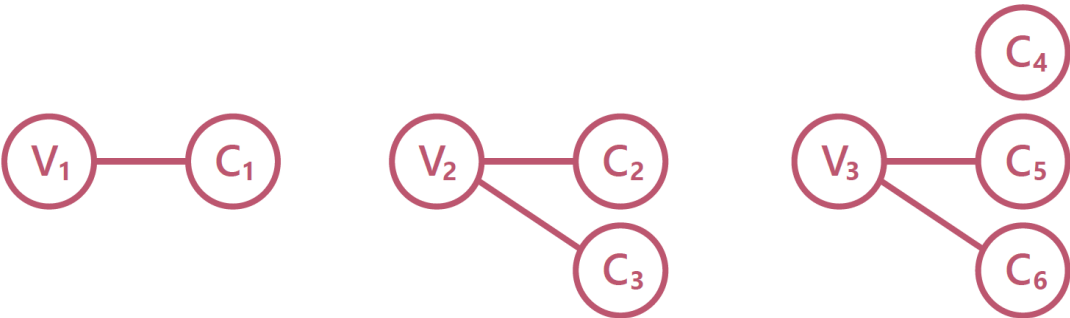

**Fig S2.** 1-dimensional illustration of how unlabeled data can help in a simple classification problem

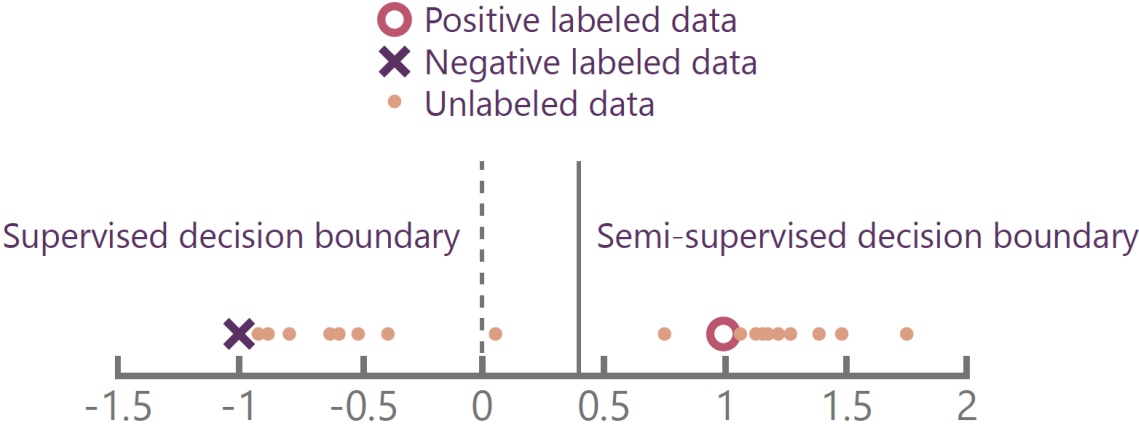

**Fig S3.** Prediction histograms for 20 randomized initial label assignments for (a) stunting, (b) underweight, and (c) wasting

(a) Stunting

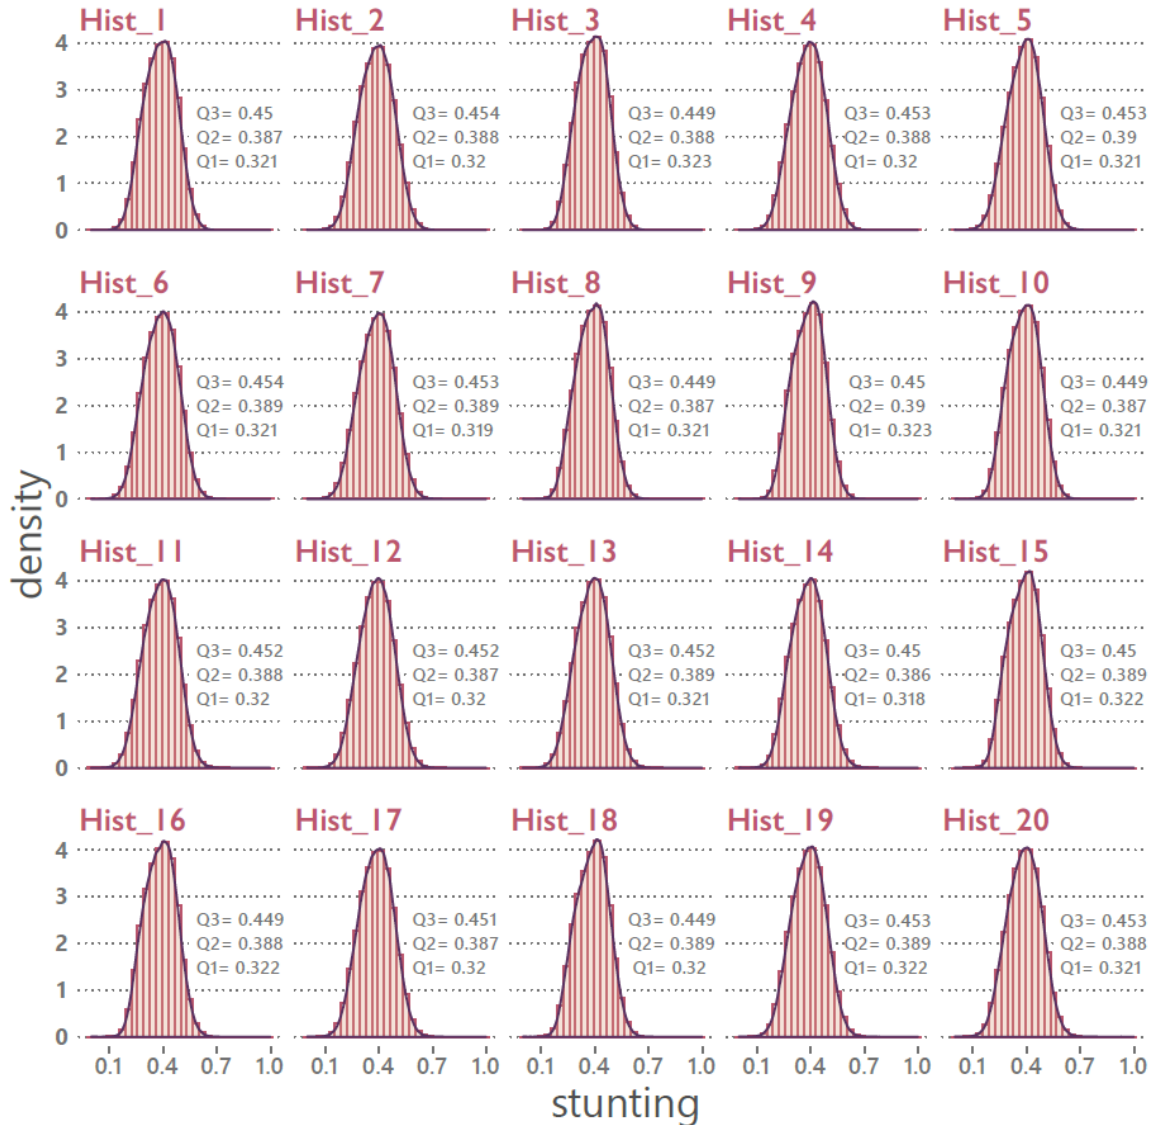

(b) Underweight

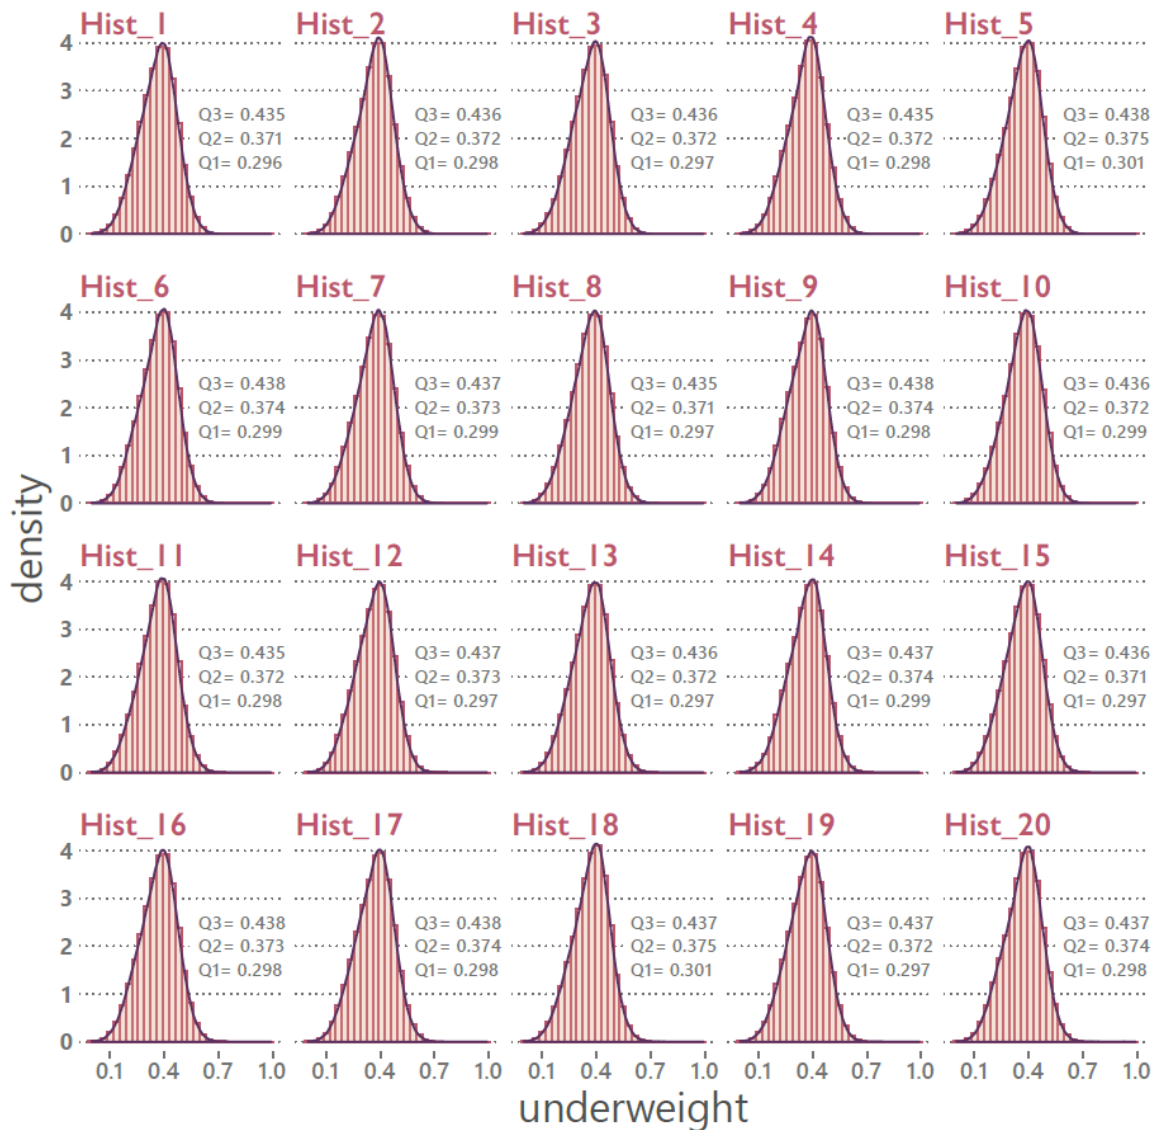

(c) Wasting

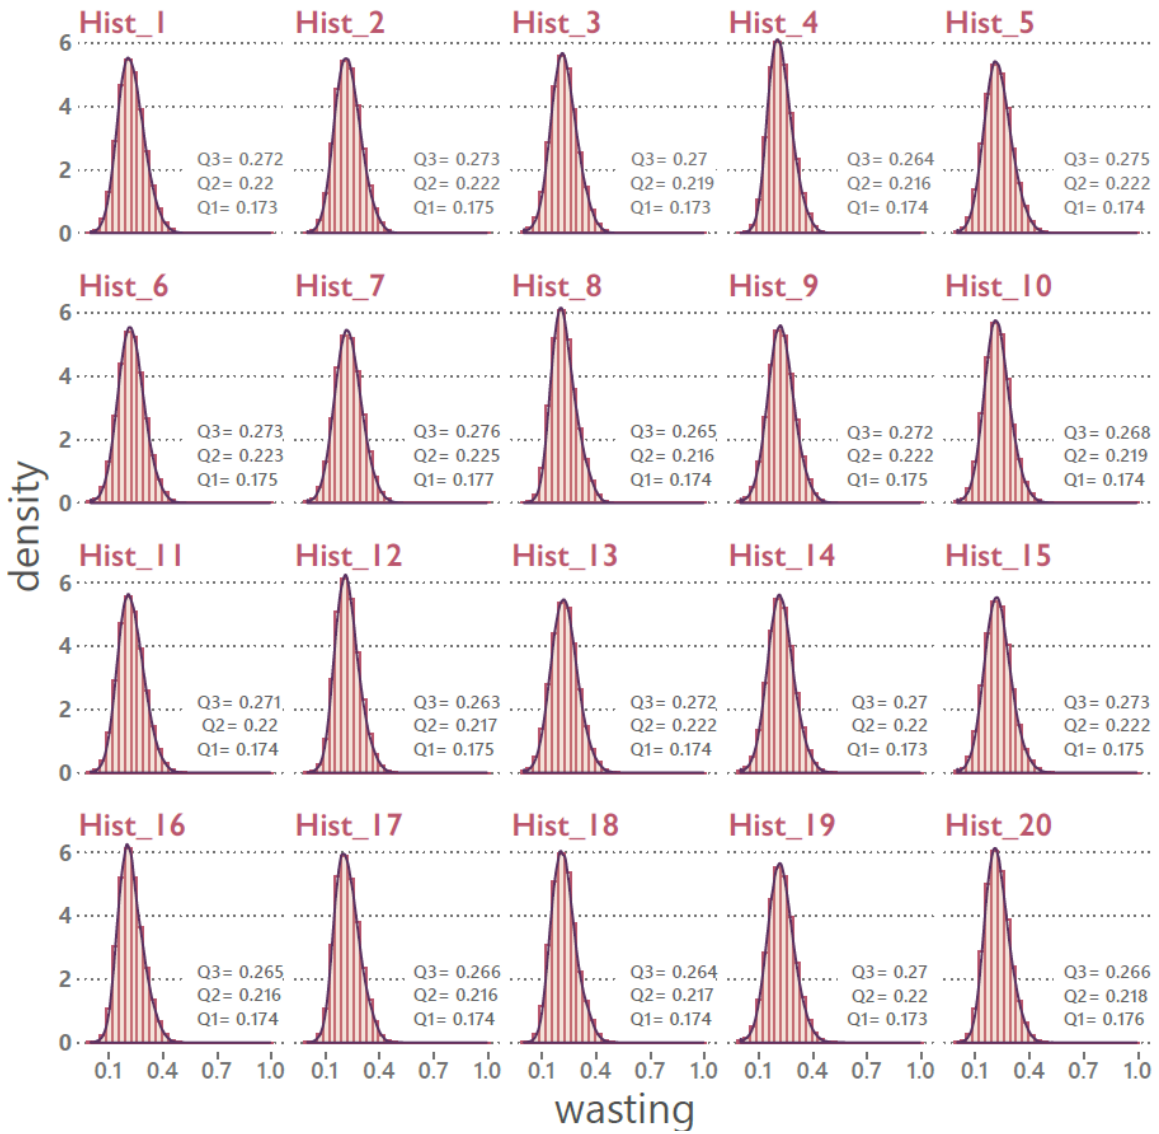

**Fig S4.** Range variation in (a) stunting, (b) underweight, and (c) wasting as the number of mapped villages increases.

(a) Stunting

## Scatterplot

Village Count (per Cluster) / Stunting

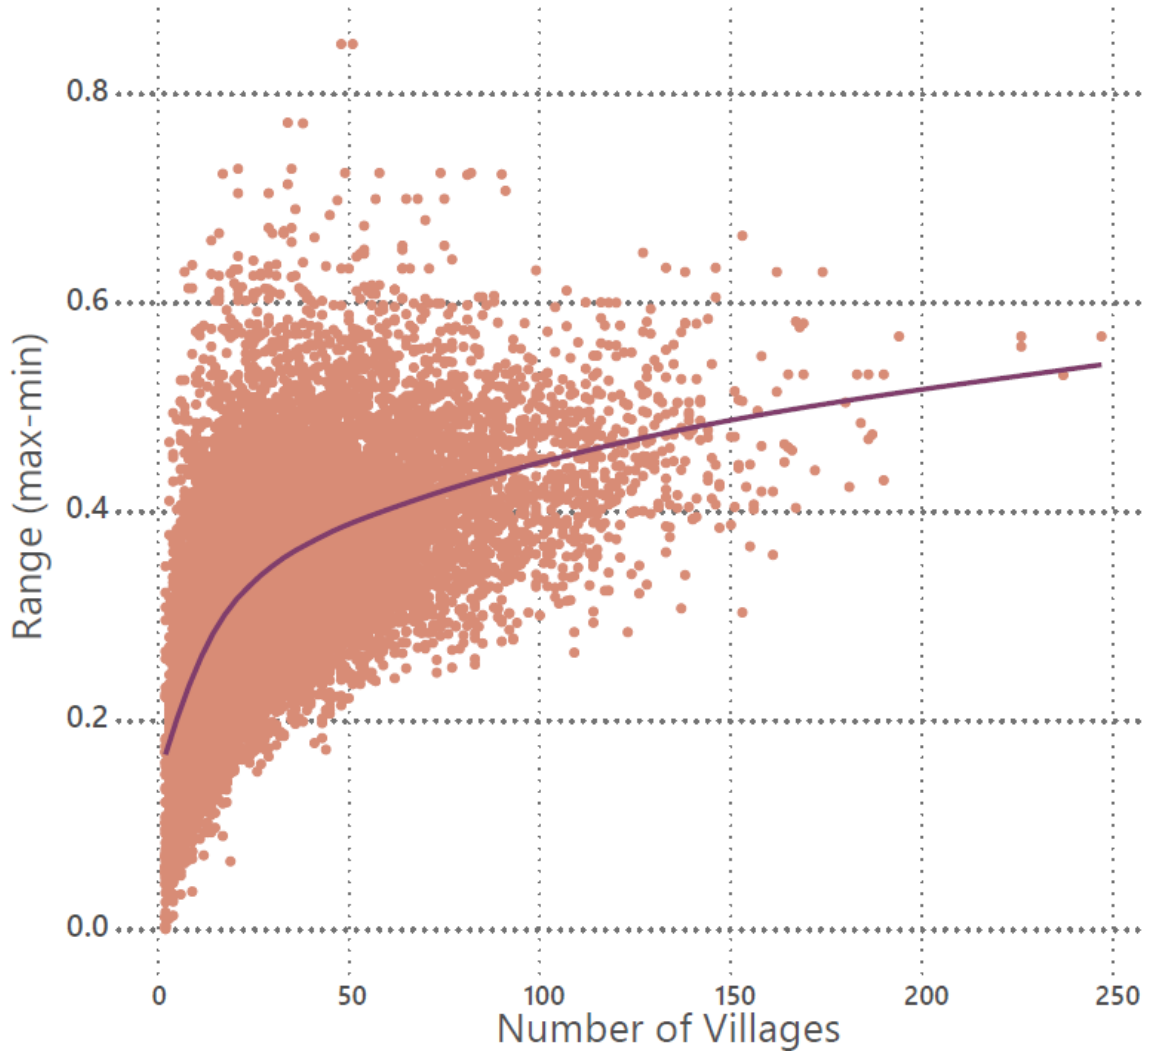

(b) Underweight

## Scatterplot

Village Count (per Cluster) / Underweight

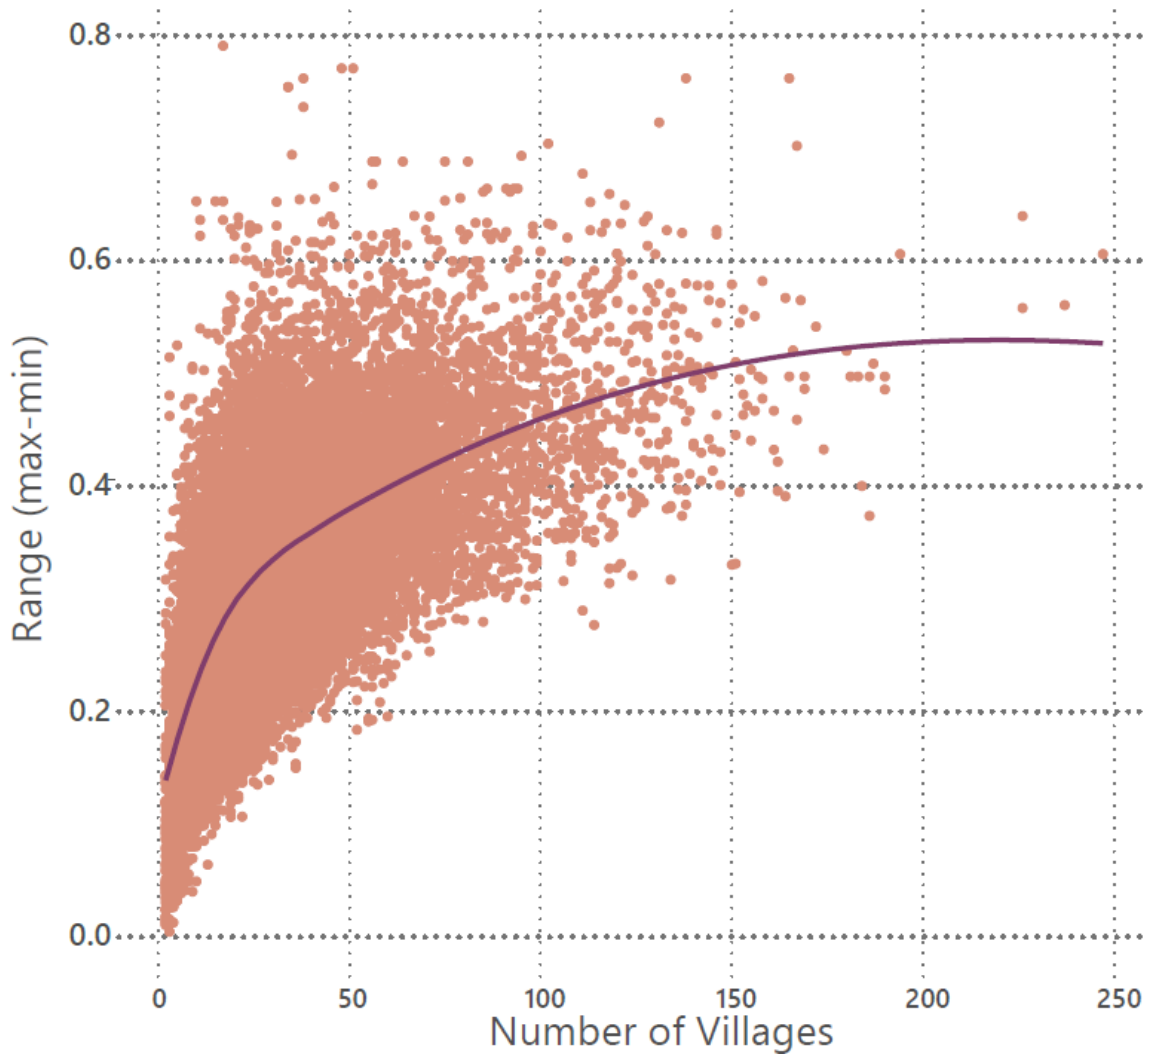



(c) Wasting

## Scatterplot

Village Count (per Cluster) / Wasting

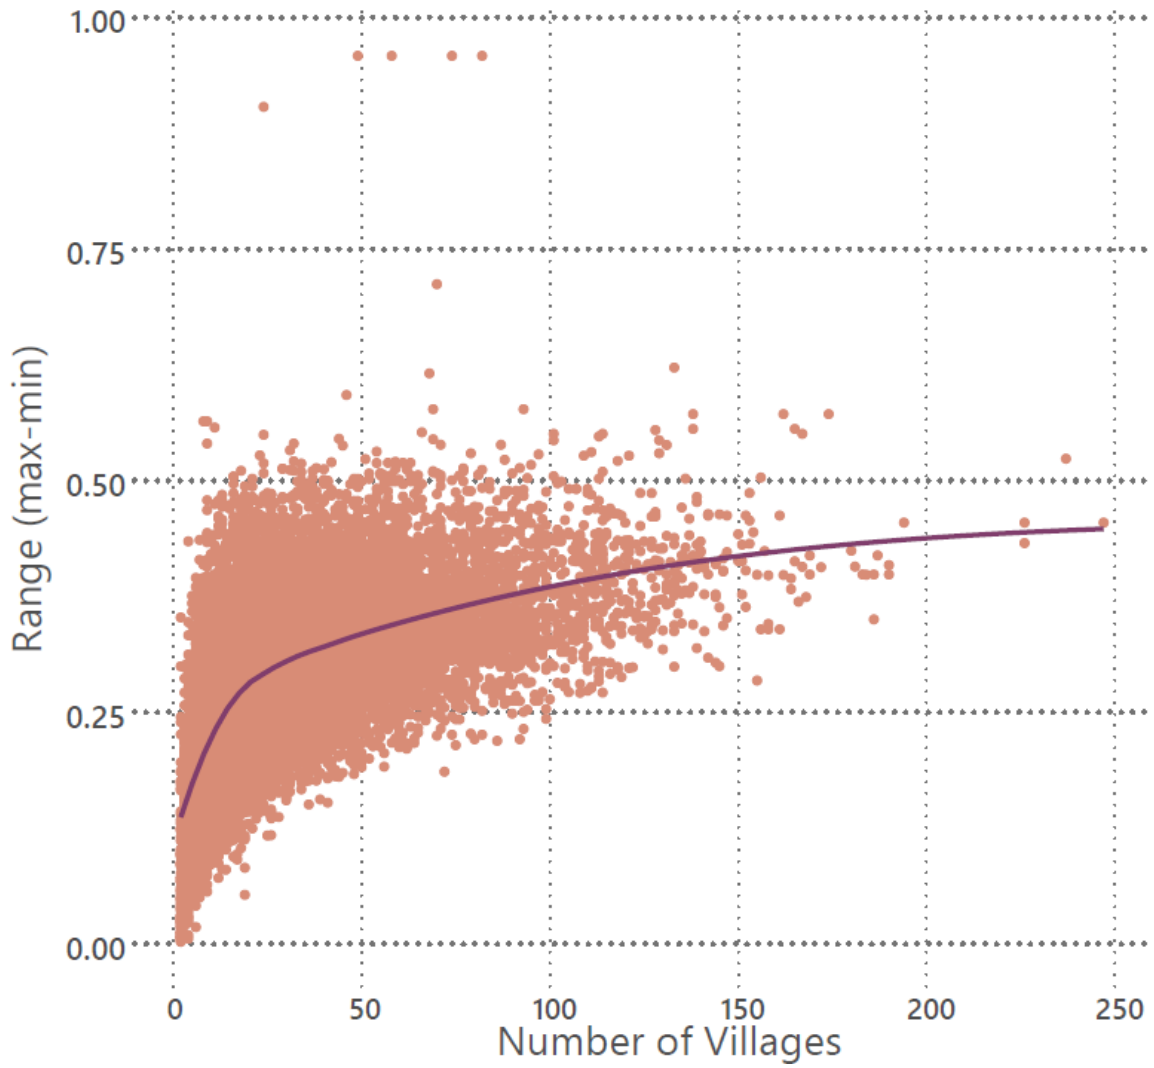

**Table S1.** List of 2011 Census demographic and amenities features used for prediction models

| Variable name | Definition                                                                                          | Note                                          |
|---------------|-----------------------------------------------------------------------------------------------------|-----------------------------------------------|
| tot_hh        | Total number of household                                                                           | Raw variable from ML Infomap demographic file |
| m_mnw         | Male Main Workers                                                                                   | Raw variable from ML Infomap demographic file |
| f_mnw         | Female Main Workers                                                                                 | Raw variable from ML Infomap demographic file |
| m_cult        | Male Cultivators                                                                                    | Raw variable from ML Infomap demographic file |
| f_cult        | Female Cultivators                                                                                  | Raw variable from ML Infomap demographic file |
| m_aglb        | Male Agricultural Labourers                                                                         | Raw variable from ML Infomap demographic file |
| f_aglb        | Female Agricultural Labourers                                                                       | Raw variable from ML Infomap demographic file |
| m_mfhh        | Male Household industry workers                                                                     | Raw variable from ML Infomap demographic file |
| f_mfhh        | Female Household industry workers                                                                   | Raw variable from ML Infomap demographic file |
| m_oth_w       | Male other workers                                                                                  | Raw variable from ML Infomap demographic file |
| f_oth_w       | Female other workers                                                                                | Raw variable from ML Infomap demographic file |
| m_mrg_3_6     | Male Marginal Workers- worked for 3 months or more but less than 6 months                           | Raw variable from ML Infomap demographic file |
| f_mrg_3_6     | Female Marginal Workers- worked for 3 months or more but less than 6 months                         | Raw variable from ML Infomap demographic file |
| m_m_cl_3_6    | Male Marginal Cultivators- worked for 3 months or more but less than 6 months                       | Raw variable from ML Infomap demographic file |
| f_m_cl_3_6    | Female Marginal Cultivators- worked for 3 months or more but less than 6 months                     | Raw variable from ML Infomap demographic file |
| m_mag_3_6     | Male Marginal Agricultural Labourers- worked for 3 months or more but less than 6 months            | Raw variable from ML Infomap demographic file |
| f_mag_3_6     | Female Marginal Agricultural Labourers- worked for 3 months or more but less than 6 months          | Raw variable from ML Infomap demographic file |
| m_mhh_3_6     | Male Marginal Workers in Household Industries- worked for 3 months or more but less than 6 months   | Raw variable from ML Infomap demographic file |
| f_mhh_3_6     | Female Marginal Workers in Household Industries- worked for 3 months or more but less than 6 months | Raw variable from ML Infomap demographic file |
| m_mot_3_6     | Male Marginal Other Workers- worked for 3 months or more but less than 6 months                     | Raw variable from ML Infomap demographic file |

|                            |                                                                                   |                                                   |
|----------------------------|-----------------------------------------------------------------------------------|---------------------------------------------------|
| f_mot_3_6                  | Female Marginal Other Workers- worked for 3 months or more but less than 6 months | Raw variable from ML Infomap demographic file     |
| m_mrg_0_3                  | Male Marginal Workers- worked for less than 3 months                              | Raw variable from ML Infomap demographic file     |
| f_mrg_0_3                  | Female Marginal Workers- worked for less than 3 months                            | Raw variable from ML Infomap demographic file     |
| m_m_cl_0_3                 | Male Marginal Cultivators- worked for less than 3 months                          | Raw variable from ML Infomap demographic file     |
| f_m_cl_0_3                 | Female Marginal Cultivators- worked for less than 3 months                        | Raw variable from ML Infomap demographic file     |
| m_mag_0_3                  | Male Marginal Agricultural Labourers- worked for less than 3 months               | Raw variable from ML Infomap demographic file     |
| f_mag_0_3                  | Female Marginal Agricultural Labourers- worked for less than 3 months             | Raw variable from ML Infomap demographic file     |
| m_mhh_0_3                  | Male Marginal Workers in Household Industries- worked for less than 3 months      | Raw variable from ML Infomap demographic file     |
| f_mhh_0_3                  | Female Marginal Workers in Household Industries- worked for less than 3 months    | Raw variable from ML Infomap demographic file     |
| m_mot_0_3                  | Male Marginal Other Workers                                                       | Raw variable from ML Infomap demographic file     |
| f_mot_0_3                  | Female Marginal Other Workers                                                     | Raw variable from ML Infomap demographic file     |
| m_nnw                      | Male Non-workers                                                                  | Raw variable from ML Infomap demographic file     |
| f_nnw                      | Female Non-workers                                                                | Raw variable from ML Infomap demographic file     |
| population_per_hectare     | $\text{tot\_pop} / \text{Total\_Geographical\_Area\_in\_Hect}$                    | Derived variable from ML Infomap demographic file |
| sex_ratio                  | $\text{f\_pop} / \text{m\_pop}$                                                   | Derived variable from ML Infomap demographic file |
| child_population           | $\text{tot\_l6} / \text{tot\_pop}$                                                | Derived variable from ML Infomap demographic file |
| child_sex_ratio            | $\text{f\_l6} / \text{m\_l6}$                                                     | Derived variable from ML Infomap demographic file |
| proportion_SC              | $\text{tot\_sc} / \text{tot\_pop}$                                                | Derived variable from ML Infomap demographic file |
| proportion_ST              | $\text{tot\_st} / \text{tot\_pop}$                                                | Derived variable from ML Infomap demographic file |
| proportion_total_literate  | $\text{tot\_lit} / (\text{tot\_pop} - \text{tot\_l6})$                            | Derived variable from ML Infomap demographic file |
| proportion_male_literate   | $\text{m\_lit} / (\text{m\_pop} - \text{m\_l6})$                                  | Derived variable from ML Infomap demographic file |
| proportion_female_literate | $\text{f\_lit} / (\text{f\_pop} - \text{f\_l6})$                                  | Derived variable from ML Infomap demographic file |
| proportion_workers         | $\text{tot\_w} / (\text{tot\_pop} - \text{tot\_l6})$                              | Derived variable from ML Infomap demographic file |
| proportion_male_workers    | $\text{m\_w} / (\text{m\_pop} - \text{m\_l6})$                                    | Derived variable from ML Infomap demographic file |
| proportion_female_workers  | $\text{f\_w} / (\text{f\_pop} - \text{f\_l6})$                                    | Derived variable from ML Infomap demographic file |
| proportion_AGLB            | $\text{tot\_aglb} / \text{tot\_w}$                                                | Derived variable from ML Infomap demographic file |

|                                   |                                                                    |                                                   |
|-----------------------------------|--------------------------------------------------------------------|---------------------------------------------------|
| proportion_MRW                    | tot_mrwr / tot_w                                                   | Derived variable from ML Infomap demographic file |
| proportion_MRG_3_6                | t_mrg_3_6 / tot_w                                                  | Derived variable from ML Infomap demographic file |
| proportion_MRG_0_3                | t_mrg_0_3 / tot_w                                                  | Derived variable from ML Infomap demographic file |
| District_Head_Quarter__Distance   | District Head Quarter (Distance in km)                             | Raw variable from village amenities file          |
| Nearest_Statutory_Town__Distance  | Nearest Statutory Town (Distance in km)                            | Raw variable from village amenities file          |
| Total_Geographical_Area__in_Hect  | Total Geographical Area (in Hectares)                              | Raw variable from village amenities file          |
| Govt_Pre_Primary_School__Nursery  | Govt Pre-Primary School (Nursery/LKG/UKG) (Status A(1)/NA(2))      | Derived variable from village amenities file      |
| Private_Pre__Primary_School__Nu   | Private Pre - Primary School (Nursery/LKG/UKG) (Status A(1)/NA(2)) | Derived variable from village amenities file      |
| Govt_Primary_School__Status       | Govt Primary School (Status A(1)/NA(2))                            | Derived variable from village amenities file      |
| Private_Primary_School__Status_A  | Private Primary School (Status A(1)/NA(2))                         | Derived variable from village amenities file      |
| Govt__Middle_School__Status       | Govt Middle School (Status A(1)/NA(2))                             | Derived variable from village amenities file      |
| Private_Middle__School__Status_A  | Private Middle School (Status A(1)/NA(2))                          | Derived variable from village amenities file      |
| Govt_Secondary_School__Status_A   | Govt Secondary School (Status A(1)/NA(2))                          | Derived variable from village amenities file      |
| Private_Secondary_School__Status  | Private Secondary School (Status A(1)/NA(2))                       | Derived variable from village amenities file      |
| Govt_Senior_Secondary_School__St  | Govt Senior Secondary School (Status A(1)/NA(2))                   | Derived variable from village amenities file      |
| Private_Senior_Secondary_School   | Private Senior Secondary School (Status A(1)/NA(2))                | Derived variable from village amenities file      |
| Govt__Arts_and_Science_Degree_Co  | Govt Arts and Science Degree College (Status A(1)/NA(2))           | Derived variable from village amenities file      |
| Private__Arts_and_Science_Degree  | Private Arts and Science Degree College (Status A(1)/NA(2))        | Derived variable from village amenities file      |
| Govt_Engineering_College__Status  | Govt Engineering College (Status A(1)/NA(2))                       | Derived variable from village amenities file      |
| Private_Engineering_College__Sta  | Private Engineering College (Status A(1)/NA(2))                    | Derived variable from village amenities file      |
| Govt_Medicine_College__Status_A   | Govt Medicine College (Status A(1)/NA(2))                          | Derived variable from village amenities file      |
| Private_Medicine__College__Statu  | Private Medicine College (Status A(1)/NA(2))                       | Derived variable from village amenities file      |
| Govt_Management_Institute__Statu  | Govt Management Institute (Status A(1)/NA(2))                      | Derived variable from village amenities file      |
| Private_Management_Institute__St  | Private Management Institute (Status A(1)/NA(2))                   | Derived variable from village amenities file      |
| Govt_Polytechnic__Status          | Govt Polytechnic (Status A(1)/NA(2))                               | Derived variable from village amenities file      |
| Private_Polytechnic__Status       | Private Polytechnic (Status A(1)/NA(2))                            | Derived variable from village amenities file      |
| Govt_Vocational_Training_School__ | Govt Vocational Training School/ITI (Status A(1)/NA(2))            | Derived variable from village amenities file      |

|                                  |                                                                                              |                                              |
|----------------------------------|----------------------------------------------------------------------------------------------|----------------------------------------------|
| Private_Vocational_Training_Scho | Private Vocational Training School/ITI (Status A(1)/NA(2))                                   | Derived variable from village amenities file |
| Government_Non_Forma Training_C  | Government Non Formal Training Centre (Status A(1)/NA(2))                                    | Derived variable from village amenities file |
| Private_Non_Forma Training_Cent  | Private Non Formal Training Centre (Status A(1)/NA(2))                                       | Derived variable from village amenities file |
| Government_School_For_Disabled__ | Government School For Disabled (Status A(1)/NA(2))                                           | Derived variable from village amenities file |
| Private_School_For_Disabled__St  | Private School For Disabled (Status A(1)/NA(2))                                              | Derived variable from village amenities file |
| Government_Others_Status         | Government Others (Status A(1)/NA(2))                                                        | Derived variable from village amenities file |
| Private_Others_Status            | Private Others (Status A(1)/NA(2))                                                           | Derived variable from village amenities file |
| Community_Health_Centre_Status   | Community Health Centre (Status A(1)/NA(2))                                                  | Derived variable from village amenities file |
| Primary_Health_Centre_Status     | Primary Health Centre (Status A(1)/NA(2))                                                    | Derived variable from village amenities file |
| Primary_Health_Sub_Centre_Status | Primary Health Sub Centre (Status A(1)/NA(2))                                                | Derived variable from village amenities file |
| Maternity_Child_Center_Status    | Maternity And Child Welfare Centre (Status A(1)/NA(2))                                       | Derived variable from village amenities file |
| TB_Clinic_Status                 | TB Clinic (Status A(1)/NA(2))                                                                | Derived variable from village amenities file |
| Hospital_Allopathic_Status       | Hospital Allopathic (Status A(1)/NA(2))                                                      | Derived variable from village amenities file |
| Hospital_Alternative_Status      | Hospital Alternative Medicine (Status A(1)/NA(2))                                            | Derived variable from village amenities file |
| Dispensary_Status                | Dispensary (Status A(1)/NA(2))                                                               | Derived variable from village amenities file |
| Veterinary_Hospital_Status       | Veterinary Hospital (Status A(1)/NA(2))                                                      | Derived variable from village amenities file |
| Mobile_Health_Clinic_Status      | Mobile Health Clinic (Status A(1)/NA(2))                                                     | Derived variable from village amenities file |
| Family_Welfare_Center_Status     | Family Welfare Centre (Status A(1)/NA(2))                                                    | Derived variable from village amenities file |
| Non_Gov_Medical_Out_Status       | Non Government Medical facilities Out Patient (Status A(1)/NA(2))                            | Derived variable from village amenities file |
| Non_Gov_Medical_InOut_Status     | Non Government Medical facilities In and Out Patient (Status A(1)/NA(2))                     | Derived variable from village amenities file |
| Non_Gov_Medical_Char_Status      | Non Government Medical facilities Charitable (Status A(1)/NA(2))                             | Derived variable from village amenities file |
| Non_Gov_Medical_MBBS_Status      | Non Government Medical facilities Medical Practitioner with MBBS Degree (Status A(1)/NA(2))  | Derived variable from village amenities file |
| Non_Gov_Medical_OtherDeg_Status  | Non Government Medical facilities Medical Practitioner with Other Degree (Status A(1)/NA(2)) | Derived variable from village amenities file |
| Non_Gov_Medical_NoDeg_Status     | Non Government Medical facilities Medical Practitioner with No Degree (Status A(1)/NA(2))    | Derived variable from village amenities file |

|                                  |                                                                                                        |                                              |
|----------------------------------|--------------------------------------------------------------------------------------------------------|----------------------------------------------|
| Non_Gov_Medical_Faith_Status     | Non Government Medical facilities Traditional Pracitioner and Faith Healer(Status A(1)/NA(2))          | Derived variable from village amenities file |
| Non_Gov_Medical_Shop_Status      | Non Government Medical facilities Medicine Shop(Status A(1)/NA(2))                                     | Derived variable from village amenities file |
| Non_Gov_Medical_Others_Status    | Non Government Medical facilities Other(Status A(1)/NA(2))                                             | Derived variable from village amenities file |
| Tap_Water_Treated_Status         | Tap Water-Treated (Status A(1)/NA(2))                                                                  | Derived variable from village amenities file |
| Tap_Water_Untreated_Status       | Tap Water Untreated (Status A(1)/NA(2))                                                                | Derived variable from village amenities file |
| Covered_Well_Status              | Covered Well (Status A(1)/NA(2))                                                                       | Derived variable from village amenities file |
| Uncovered__Well_Status           | Uncovered Well (Status A(1)/NA(2))                                                                     | Derived variable from village amenities file |
| Hand_Pump_Functioning_Status     | Hand Pump (Status A(1)/NA(2))                                                                          | Derived variable from village amenities file |
| Tube_Wells_Borehole_Status       | Tube Wells/Borehole (Status A(1)/NA(2))                                                                | Derived variable from village amenities file |
| Spring_Functioning_Status        | Spring (Status A(1)/NA(2))                                                                             | Derived variable from village amenities file |
| River_Canal_Functioning_Status   | River/Canal (Status A(1)/NA(2))                                                                        | Derived variable from village amenities file |
| Tank_Pond_Lake_Status            | Tank/Pond/Lake (Status A(1)/NA(2))                                                                     | Derived variable from village amenities file |
| Other_water_Status               | Others (Status A(1)/NA(2))                                                                             | Derived variable from village amenities file |
| Closed_Drainage_Status           | Closed Drainage (Status A(1)/NA(2))                                                                    | Derived variable from village amenities file |
| Open_Drainage_Status             | Open Drainage (Status A(1)/NA(2))                                                                      | Derived variable from village amenities file |
| No_Drainage_Status               | No Drainage (Status A(1)/NA(2))                                                                        | Derived variable from village amenities file |
| Open_Pucca_Drainage_Covered_with | Open Pucca Drainage Covered with Tiles Slabs (Status A(1)/NA(2))                                       | Derived variable from village amenities file |
| Open_Pucca_Drainage_Uncovered__S | Open Pucca Drainage Uncovered (Status A(1)/NA(2))                                                      | Derived variable from village amenities file |
| Open_Kuccha_Drainage__Status_A_1 | Open Kuccha Drainage (Status A(1)/NA(2))                                                               | Derived variable from village amenities file |
| Whether_Drain_water_is_discharge | Whether Drain water is discharged directly into water bodies or to sewer plant (                       | Derived variable from village amenities file |
| TSC_coverage                     | Is the Area Covered under Total Sanitation Campaign (TSC)? (Status A(1)/NA(2))                         | Derived variable from village amenities file |
| Community_Toilet_Complex__includ | Community Toilet Complex (including Bath) for General Public (Status A(1)/NA(2))                       | Derived variable from village amenities file |
| Community_Toilet_Complex__exclud | Community Toilet Complex (excluding Bath) for General Public (Status A(1)/NA(2))                       | Derived variable from village amenities file |
| Rural_Production_Centres_or_Sani | Rural Production Centres or Sanitary hardware outlet availability near the village (Status A(1)/NA(2)) | Derived variable from village amenities file |

|                                  |                                                                                                     |                                              |
|----------------------------------|-----------------------------------------------------------------------------------------------------|----------------------------------------------|
| Rural_Production_mart_or_Sanitar | Rural Production mart or Sanitary hardware outlet availability near the village (Status A(1)/NA(2)) | Derived variable from village amenities file |
| Community_waste_disposal_system  | Community waste disposal system after house to house collection (Status A(1)/NA(2))                 | Derived variable from village amenities file |
| Community_Bio_gas_or_recycle_of  | Community Bio-gas or recycle of waste for production use (Status A(1)/NA(2))                        | Derived variable from village amenities file |
| No_System__Garbage_on_road_stree | No System (Garbage on road/street) (Status A(1)/NA(2))                                              | Derived variable from village amenities file |
| Post_Office_Status               | Post Office (Status A(1)/NA(2))                                                                     | Derived variable from village amenities file |
| Sub_Post_Office_Status           | Sub Post Office (Status A(1)/NA(2))                                                                 | Derived variable from village amenities file |
| Post_And_Telegraph_Office__Statu | Post And Telegraph Office (Status A(1)/NA(2))                                                       | Derived variable from village amenities file |
| Village_Pin_Code_Status          | Village Pin Code (Status A(1)/NA(2))                                                                | Derived variable from village amenities file |
| Telephone_Landlines_Status       | Telephone (landlines) (Status A(1)/NA(2))                                                           | Derived variable from village amenities file |
| PCO_Mobile_Status                | Public Call Office /Mobile (PCO) (Status A(1)/NA(2))                                                | Derived variable from village amenities file |
| Mobile_Phone_Coverage__Status_A_ | Mobile Phone Coverage (Status A(1)/NA(2))                                                           | Derived variable from village amenities file |
| Internet_Cafes__Common_Service   | Internet Cafes / Common Service Centre (CSC) (Status A(1)/NA(2))                                    | Derived variable from village amenities file |
| Private_Courier_Facility__Status | Private Courier Facility (Status A(1)/NA(2))                                                        | Derived variable from village amenities file |
| Public_Bus_Service_Status        | Public Bus Service (Status A(1)/NA(2))                                                              | Derived variable from village amenities file |
| Private_Bus_Service_Status       | Private Bus Service (Status A(1)/NA(2))                                                             | Derived variable from village amenities file |
| Railway_Station_Status           | Railway Station (Status A(1)/NA(2))                                                                 | Derived variable from village amenities file |
| Auto_Status                      | Auto/Modified Autos (Status A(1)/NA(2))                                                             | Derived variable from village amenities file |
| Taxi_Status                      | Taxi (Status A(1)/NA(2))                                                                            | Derived variable from village amenities file |
| Vans_Status                      | Vans (Status A(1)/NA(2))                                                                            | Derived variable from village amenities file |
| Tractors_Status                  | Tractors (Status A(1)/NA(2))                                                                        | Derived variable from village amenities file |
| Cycle_pulled_Rickshaws___manual  | Cycle-pulled Rickshaws (manual driven) (Status A(1)/NA(2))                                          | Derived variable from village amenities file |
| Cycle_pulled_Rickshaws__machine  | Cycle-pulled Rickshaws (machine driven) (Status A(1)/NA(2))                                         | Derived variable from village amenities file |
| Carts_Drivens_by_Animals__Status | Carts Drivens by Animals (Status A(1)/NA(2))                                                        | Derived variable from village amenities file |
| Sea_River_Ferry_Service_Status   | Sea/River/Ferry Service (Status A(1)/NA(2))                                                         | Derived variable from village amenities file |
| National_Highway_Status          | National Highway (Status A(1)/NA(2))                                                                | Derived variable from village amenities file |
| State_Highway_Status             | State Highway (Status A(1)/NA(2))                                                                   | Derived variable from village amenities file |



|                                  |                                                           |                                              |
|----------------------------------|-----------------------------------------------------------|----------------------------------------------|
| MajorDistrict_Highway_Status     | Major District Road (Status A(1)/NA(2))                   | Derived variable from village amenities file |
| OtherDistrict_Highway_Status     | Other District Road (Status A(1)/NA(2))                   | Derived variable from village amenities file |
| Pucca_Road_Status                | Black Topped (pucca) Road (Status A(1)/NA(2))             | Derived variable from village amenities file |
| Gravel_Road_Status               | Gravel (kuchha) Roads (Status A(1)/NA(2))                 | Derived variable from village amenities file |
| Water_Bounded_Macadam__Status_A  | Water Bounded Macadam (Status A(1)/NA(2))                 | Derived variable from village amenities file |
| AllWeather_Road_Status           | All Weather Road (Status A(1)/NA(2))                      | Derived variable from village amenities file |
| Navigable_Waterways__River_Canal | Navigable Waterways (River/Canal) (Status A(1)/NA(2))     | Derived variable from village amenities file |
| Footpath_Status                  | Foothpath (Status A(1)/NA(2))                             | Derived variable from village amenities file |
| ATM_Status                       | ATM (Status A(1)/NA(2))                                   | Derived variable from village amenities file |
| Commercial_Bank_Status           | Commercial Bank (Status A(1)/NA(2))                       | Derived variable from village amenities file |
| Cooperative_Bank_Status          | Cooperative Bank (Status A(1)/NA(2))                      | Derived variable from village amenities file |
| Agricultural_Credit_Societies__S | Agricultural Credit Societies (Status A(1)/NA(2))         | Derived variable from village amenities file |
| Self_Help_Group_Status           | Self - Help Group (SHG) (Status A(1)/NA(2))               | Derived variable from village amenities file |
| Public_Distribution_System__PDS_ | Public Distribution System (PDS) Shop (Status A(1)/NA(2)) | Derived variable from village amenities file |
| Regular_Market_Status            | Mandis/Regular Market (Status A(1)/NA(2))                 | Derived variable from village amenities file |
| Weekly_Haat_Status               | Weekly Haat (Status A(1)/NA(2))                           | Derived variable from village amenities file |
| Agricultural_Marketing_Society__ | Agricultural Marketing Society (Status A(1)/NA(2))        | Derived variable from village amenities file |
| Nutritional_Centres_ICDS__Status | Nutritional Centres-ICDS (Status A(1)/NA(2))              | Derived variable from village amenities file |
| Nutritional_Centres_Anganwadi_Ce | Nutritional Centres-Anganwadi Centre (Status A(1)/NA(2))  | Derived variable from village amenities file |
| Nutritional_Centres_Others__Stat | Nutritional Centres-Others (Status A(1)/NA(2))            | Derived variable from village amenities file |
| ASHA_Status                      | ASHA (Status A(1)/NA(2))                                  | Derived variable from village amenities file |
| Community_Centre_with_without_TV | Community Centre with/without TV (Status A(1)/NA(2))      | Derived variable from village amenities file |
| Sports_Field_Status              | Sports Field (Status A(1)/NA(2))                          | Derived variable from village amenities file |
| Sports_Club_Recreation_Centre__S | Sports Club/Recreation Centre (Status A(1)/NA(2))         | Derived variable from village amenities file |
| Cinema_Video_Hall                | Cinema/Video Hall (Status A(1)/NA(2))                     | Derived variable from village amenities file |
| Public_library_status            | Public Library (Status A(1)/NA(2))                        | Derived variable from village amenities file |
| Public_reading_room              | Public Reading Room (Status A(1)/NA(2))                   | Derived variable from village amenities file |
| Daily_Newspaper_Supply__Status_A | Daily Newspaper Supply (Status A(1)/NA(2))                | Derived variable from village amenities file |



|                                  |                                                              |                                              |
|----------------------------------|--------------------------------------------------------------|----------------------------------------------|
| Assembly_Polling_Station__Status | Assembly Polling Station (Status A(1)/NA(2))                 | Derived variable from village amenities file |
| Birth_and_Death_Registration_Off | Birth and Death Registration Office (Status A(1)/NA(2))      | Derived variable from village amenities file |
| Power_Supply_For_Domestic_Use    | Power Supply For Domestic Use (Status A(1)/NA(2))            | Derived variable from village amenities file |
| Power_Supply_For_Agriculture_Use | Power Supply For Agriculture Use (Status A(1)/NA(2))         | Derived variable from village amenities file |
| Power_Supply_For_Commercial_Use  | Power Supply For Commercial Use (Status A(1)/NA(2))          | Derived variable from village amenities file |
| Power_Supply_For_All_Users       | Power Supply For All Users (Status A(1)/NA(2))               | Derived variable from village amenities file |
| Forest_Area__in_Hectares__       | Forest Area (in Hectares)                                    | Raw variable from village amenities file     |
| Area_under_Non_Agricultural_Uses | Area under Non-Agricultural Uses (in Hectares)               | Raw variable from village amenities file     |
| Barren___Un_cultivable_Land_Area | Barren & Un-cultivable Land Area (in Hectares)               | Raw variable from village amenities file     |
| Permanent_Pastures_and_Other_Gra | Permanent Pastures and Other Grazing Land Area (in Hectares) | Raw variable from village amenities file     |
| Land_Under_Miscellaneous_Tree_Cr | Land Under Miscellaneous Tree Crops etc. Area (in Hectares)  | Raw variable from village amenities file     |
| Culturable_Waste_Land_Area__in_H | Culturable Waste Land Area (in Hectares)                     | Raw variable from village amenities file     |
| Fallows_Land_other_than_Current  | Fallows Land other than Current Fallows Area (in Hectares)   | Raw variable from village amenities file     |
| Current_Fallows_Area__in_Hectare | Current Fallows Area (in Hectares)                           | Raw variable from village amenities file     |
| Net_Area_Sown__in_Hectares__     | Net Area Sown (in Hectares)                                  | Raw variable from village amenities file     |
| Total_Unirrigated_Land_Area__in  | Total Unirrigated Land Area (in Hectares)                    | Raw variable from village amenities file     |
| Area_Irrigated_by_Source__in_Hec | Area Irrigated by Source (in Hectares)                       | Raw variable from village amenities file     |
| Canals_Area__in_Hectares__       | Canals Area (in Hectares)                                    | Raw variable from village amenities file     |
| Wells_Tube_Wells_Area__in_Hectar | Wells/Tube Wells Area (in Hectares)                          | Raw variable from village amenities file     |
| Tanks_Lakes_Area_Hectares        | Tanks/Lakes Area (in Hectares)                               | Raw variable from village amenities file     |
| Waterfall_Area__in_Hectares__    | Waterfall Area (in Hectares)                                 | Raw variable from village amenities file     |
| Other_Area                       | Other Source (specify) Area (in Hectares)                    | Raw variable from village amenities file     |
| Nearest_Town_Name                | Nearest Town Name                                            | Raw variable from village amenities file     |
| Nearest_Town_Distance_from_Villa | Nearest Town Distance from Village (in Km.)                  | Raw variable from village amenities file     |

**Dataset S1. (separate file)**

Predicted estimates of child anthropometric failures for 597,121 villages

**Dataset S2. (separate file)**

Analytic codes used for prediction modeling
